# Supplementary material for: Hydrothermal Synthesis of Bismuth Ferrite Hollow Spheres with Enhanced Visible-Light Photocatalytic Activity
Source: MDPI journal article supplement (doi:10.3390/molecules28135079), 2023-06-29
Supplement: s1 [file s1]

# Hydrothermal Synthesis Of Bismuth Ferrite Hollow Spheres With Enhanced Visible-Light Photocatalytic Activity

**Thomas Cadenbach** <sup>1,\*</sup>, **Valeria Sanchez** <sup>2</sup>, **Daniela Chiquito Rios**,<sup>1</sup> **Alexis Debut** <sup>3</sup>, **Karla Vizuete** <sup>3</sup>  
**and Maria J. Benitez** <sup>2,\*</sup>

<sup>1</sup> Colegio de Ciencias e Ingenierías, Universidad San Francisco de Quito, Diego de Robles y Vía Interoceánica, Quito 170901, Ecuador

<sup>2</sup> Departamento de Física, Facultad de Ciencias, Escuela Politécnica Nacional, Ladrón de Guevara E11-253, Quito 170525, Ecuador

<sup>3</sup> Centro de Nanociencia y Nanotecnología, Universidad de las Fuerzas Armadas ESPE, Av. Gral. Rumiñahui s/n, Sangolquí 171103, Ecuador; apdebut@espe.edu.ec (A.D.); ksvizuete@espe.edu.ec (K.V.)

\* Correspondence: tcadenbach@usfq.edu.ec (T.C.); maria.benitezr@epn.edu.ec (M.J.B.)

## Supporting Information

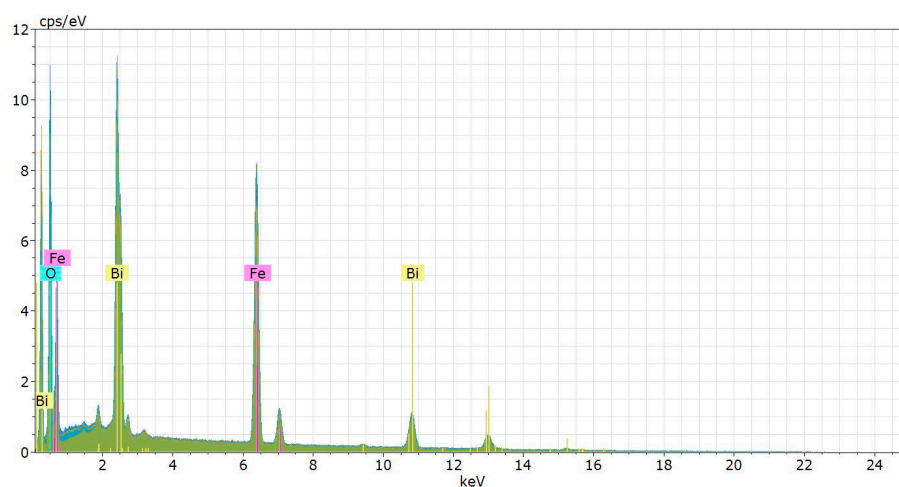

| Atom | Theoretical Subtotal Mass (%) | Measured |
|------|-------------------------------|----------|
| Bi   | 66.81                         | 67.59    |
| Fe   | 17.85                         | 17.21    |
| O    | 15.34                         | 15.74    |

**Figure S1:** EDS Spectrum of BiFeO<sub>3</sub> Hollow Spheres.

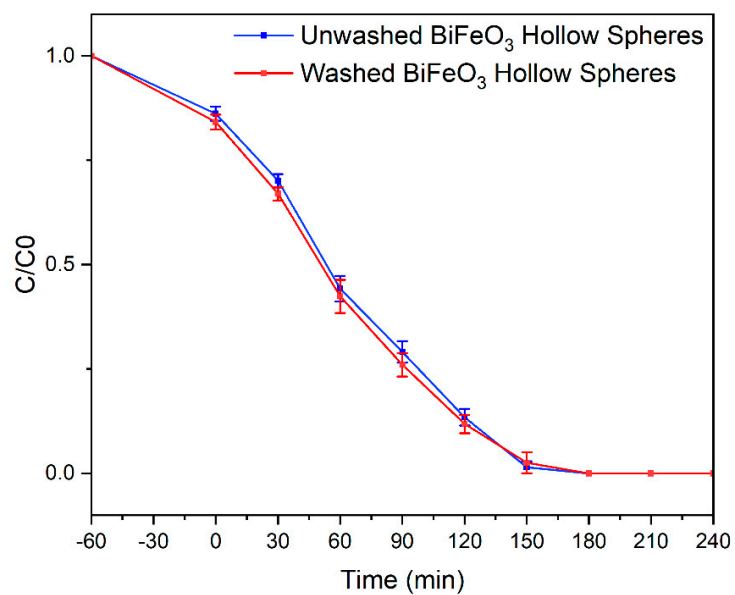

**Figure S2.** Removal of Rhodamine B as a function of irradiation time under visible-light using unwashed and washed BiFeO<sub>3</sub> hollow spheres

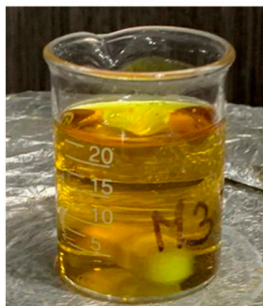

(a) Solution of metal nitrates in ethylene glycol/water

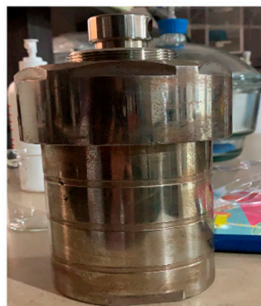

(b) 250 mL stainless steel autoclave after hydrothermal treatment

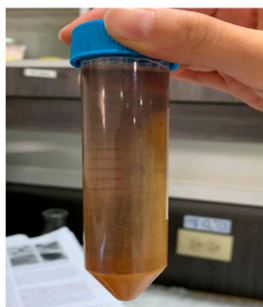

(c) Reaction mixture prior to centrifugation

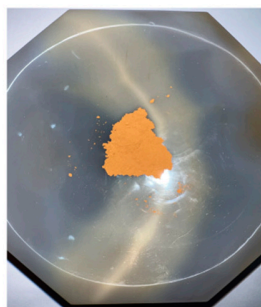

(d) Sample after calcination

**Figure S3.** Schematic representation of experimental methods

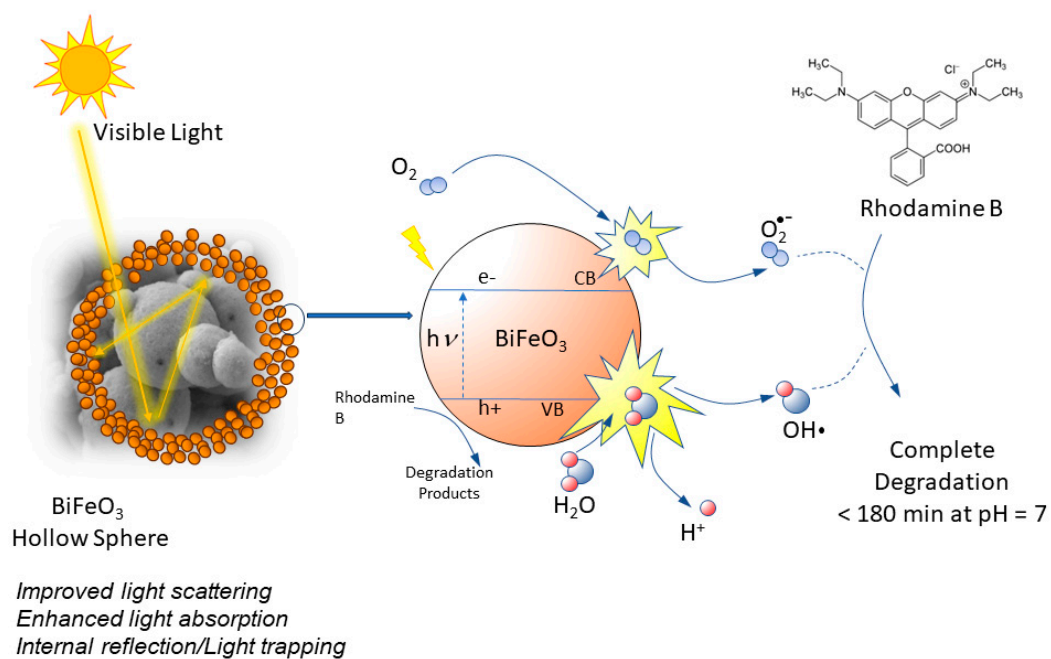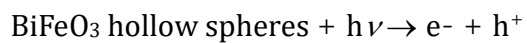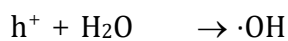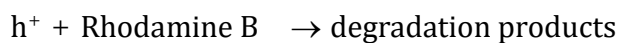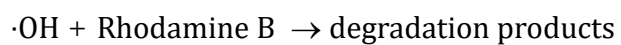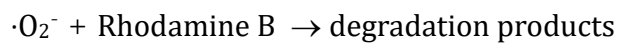

**Figure S4.** Photocatalytic mechanism of Rhodamine degradation using BiFeO<sub>3</sub> hollow spheres
